# Supplementary material for: Elevation-dependent warming: observations, models, and energetic mechanisms
Source: Copernicus journal article supplement (doi:10.5194/egusphere-2024-31), 2024-01-17
Supplement: Supplementary file [file egusphere-2024-31-AC1-supplement.pdf]

## Responses to Reviewer 1's comments

Link to review: <https://doi.org/10.5194/egusphere-2024-31-RC1>

We thank the reviewer for their constructive comments and feedback. Below we respond to each point raised:

### Summary:

The submitted manuscript examines elevation dependent warming (EDW) over the global tropics and subtropics, using a combination of gridded analyses, reanalyses, and global climate model simulations. With these datasets, the authors characterize the magnitude of EDW, the relative roles of forced response and internal variability in EDW, and the roles of various forcings and feedbacks in shaping EDW. The authors do a great job of focusing in on fundamental aspects of EDW and addressing them with thoughtful, clear, concise, and theoretically sound analyses. The addressing of forced response vs. internal variability and the formal diagnosis of mechanisms in a forcing/feedback framework are novel and very valuable additions to the EDW literature. The prose is crisp and easy to follow. The figures nicely summarize the results. The authors leave some questions unanswered (e.g., factors governing the role of cloud feedbacks in EDW, the role of unresolved terrain) but those omissions are reasonable given the scope of the study and the limitations of the datasets analyzed. I only have some small points for the authors to consider before the manuscript should be ready for publication.

We appreciate the reviewer's positive evaluation of the manuscript.

### General comments:

I think it is OK that the authors choose to take a global perspective and focus on global datasets that facilitate their analyses. However, I think that the authors should at least briefly acknowledge/discuss what might be missed in such a framework. Regions of interest for EDW are often in complex terrain that is not sampled well by observation networks used in historical (re)analyses. Furthermore, the terrain features associated with EDW may be poorly resolved in GCMs, which can bias the representation of key processes like accumulation of mountain snow cover (relevant to the snow albedo feedback) and the orographic clouds (relevant to cloud feedbacks). How much do the authors think these factors might affect their results?

We agree with the reviewer that the large-scale approach taken in our study has limitations including, in regions of complex terrain, the likely biased representation in global models of important processes (e.g., orographic clouds) and an insufficient observational network for sampling the EDW signal. As suggested, a discussion of these limitations has been added to the revised manuscript (see Lines 359-365 of the revised manuscript) and reads as follows: *“However the large-scale approach taken in this study, using global datasets at relatively coarse spatial resolutions, has limitations. For example, in regions of complex terrain the EDW signal is likely not well sampled by observational networks underpinning the HadCRUT5 and ERA5 datasets. Complex terrain is also an issue for global climate models (e.g., Elvidge et al., 2019) potentially leading to biases in the simulation of processes known to be important for EDW, including mountain snow accumulation and orographic clouds. Future research could investigate the influence of such finer-scale effects on EDW using high-resolution models; work along these lines is already underway (Minder et al., 2018; Palazzi et al., 2019).”*

In several places, the authors mention that the surface albedo feedback is expected to be "stronger at colder temperatures" (or something similar). I don't think this is quite right. The snow albedo feedback, which dominates the surface albedo feedback over land, is not necessarily stronger at cold temperatures. It is often strongest when near zero deg. C, since small temperature changes can have big effects on melting and rain vs. snow. I suggest the authors tweak their wording to reflect this.

We thank the reviewer for highlighting this point and agree that the surface albedo feedback is likely to be stronger close to the freezing point rather than at “colder temperatures” as suggested in the original manuscript. We have modified our discussion of this feedback in the revised manuscript to clarify this point (see Lines 98-100 and Lines 29-31).

Specific comments:

Introduction: Though it is a few years old, the Pepin et al. (2015) EDW review paper still seems to be the best overall review on the topic. Though they site this eventually, I think the authors should cite it more prominently in the general intro as well.

Following the reviewer's suggestion we have added to the introduction two additional citations to Pepin et al. (2015), including to the first sentence of the main text.

L 28{29: might rephrase this to focus on regions where snow/ice is plentiful, but near freezing point of water (very high/cold locations may be insensitive to the SAF, due to persistently below-freezing condition in current and perturbed climate states). See general comment #2.

This sentence has been rephrased to emphasise that the surface albedo feedback is expected to be particularly influential in regions with plentiful snow and ice close to the freezing point (see Lines 29-31).

L 35{36: Some studies have attempted to quantify and compare the role of different physical mechanisms in producing EDW, though perhaps in a less global and/or comprehensive manner as this study. Those contributions should be more clearly acknowledged here.

To this paragraph (Lines 22-39) we have added four additional citations to better connect our study to the existing EDW literature (Kotlarski et al., 2012; Pepin et al., 2015; Palazzi et al., 2017; Minder et al., 2018). We have also added text highlighting the idea that the height-dependence of free-tropospheric warming has been put forward previously as a potential explanation of EDW (see Line 28). Further, we have added the following sentence emphasising how the importance of the surface albedo feedback has been quantified in a study using regional simulations: *“Using high-resolution simulations, Minder et al. (2018) identified this albedo feedback as the primary driver of EDW in the Rocky Mountains.”* We believe these modifications to the manuscript help to better connect this study to previous work.

L 50{51: Two potential issues with this dataset should at least be acknowledged: 1. This relatively coarse resolution is insufficient to resolve many important topographic features 2. Trends for many high-elevation grid cells may have large uncertainties, due to a lack of station locations in mountainous regions.

As discussed in response to a comment above, we have added text to the ‘Summary and conclusions’ section highlighting the coarse resolution of the data used in this study and potential implications (see Lines 359-365). Regarding trends in high-elevation regions, the large HadCRUT5 error bars in Figure 1 for the high-elevation bins reflect, in part, the sparse measurements underpinning that dataset in those regions. The coarse resolution of the HadCRUT5 data and limited spatial coverage in some regions are also, we believe, well communicated by the middle panel of Figure 2. We have added the following sentence to the revised manuscript to highlight limitations with the HadCRUT5 dataset (see Lines 55-56): *“Note that HadCRUT5*

*does not provide complete spatial and temporal coverage due to limited station data in specific regions and at specific times.*"

L 50: "observational side...": I suggest adjusting this wording when writing about ERA5, since it is not purely observation-based.

Given ERA5 is an observationally-constrained dataset, we believe the description in the text is reasonable. We have added the word "estimates" to this description to flag that ERA5 does not provide direct measurements (see Line 54).

L 53{55: What is the grid spacing for the CESM1-LE runs?

The resolution of the CESM1-LE simulations is  $1^\circ \times 1^\circ$ , and this information has been added to the revised manuscript (see Line 58).

L 57: To what extent might the relatively coarse resolution of the models used (as compared to relevant terrain features) bias the simulated EDW?

As outlined above, we have added text to the final section of the manuscript discussing potential implications on simulated EDW of the coarse resolution of global climate models (see Lines 362-365).

In addition, using ERA5, we have investigated the impact on EDW of coarsening the data through horizontal averaging (Figure R1). The differences in trends between the coarsened (cyan line) and uncoarsened data (red line) are minor, suggesting that horizontal resolution does not have a substantial influence on the EDW signal averaged over the tropics and subtropics. We have added the following sentence to the caption of Figure 1 in the main text highlighting that resolution does not have a major influence on the EDW signal: "*Note that quantitatively similar results for ERA5 are obtained when the data are coarsened by horizontal averaging to a resolution of  $1^\circ \times 1^\circ$  (not shown).*"

L 93{95: See general comment #2

As discussed above, this section of text has been modified following the reviewer's suggestion (see Lines 98-100).

Section 4: This section provides a nice perspective that is often missing from the EDW literature

Section 5.3: This analysis is great. It concisely breaks down the relevant physical processes without falling into some of the analysis pitfalls of many previous studies that take a more statistical approach.

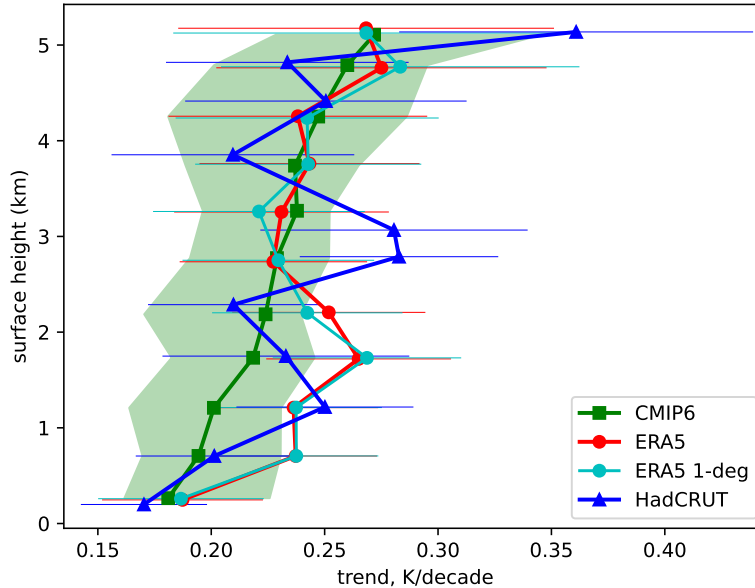

Figure R1: As in Figure 1a from the main text, but here including an additional (cyan) line showing the ERA5 warming trends binned by elevation using data that have been coarsened by horizontal averaging from  $0.25^\circ \times 0.25^\circ$  resolution to  $1^\circ \times 1^\circ$  resolution.

We thank the reviewer for the positive comments on Sections 4 and 5.3 of the text.

L 259{260: See general comment #2

The word “colder” has been removed from this sentence to make clear that the surface albedo feedback is not necessarily stronger when conditions are colder, rather it is expected to be more influential when surface snow and ice are prevalent.

L 273{276: One key aspect that is worth mentioning is the strong influence that mountains have on modulating clouds. The role of the terrain itself in modulating the cloud cover response could be an important part of the story (e.g., <https://doi.org/10.1175/JCLI-D-21-0379.1>). Also, some of these orographic effects on clouds may not be well resolved in the relatively coarse resolution simulations considered here.

We thank the reviewer for raising this important point. The sentence on Lines 281-282 of the revised manuscript has been modified to include reference to the modulating

influence of terrain on cloud radiative effects in elevated regions. In this section on cloud feedbacks we have also added a citation to the paper mentioned by the reviewer which analyses the effects of clouds on regional EDW in the Andes (Chimborazo et al., 2022). Finally, we have added text to the final section of the manuscript highlighting potential biases in the simulation of orographic clouds associated with complex terrain (see Lines 362-364).

**Section 6:** Given the authors' focus on the tropics/subtropics, it would be nice to include a few sentences of discussion to place their results more specifically in the context of previous EDW work that focuses on that part of the world.

To better connect our study to previous work on tropical EDW, we have added a new sentence and new citations (Vuille et al., 2003; Chimborazo et al., 2022) to the revised manuscript (see Lines 102-104). We have added further citations to the Chimborazo et al. (2022) study of the tropical Andes when discussing the impacts of surface albedo (Line 261) and cloud feedbacks (Line 272) on tropical/subtropical EDW.

## References

- Chimborazo, O., J. R. Minder, and M. Vuille, 2022: Observations and simulated mechanisms of elevation-dependent warming over the tropical andes. *J. Climate*, **35** (3), 1021–1044, doi:10.1175/JCLI-D-21-0379.1.
- Elvidge, A. D., and Coauthors, 2019: Uncertainty in the representation of orography in weather and climate models and implications for parameterized drag. *J. Adv. Model. Earth Sy.*, **11** (8), 2567–2585, doi:10.1029/2019MS001661.
- Kotlarski, S., T. Bosshard, D. Lüthi, P. Pall, and C. Schär, 2012: Elevation gradients of european climate change in the regional climate model cosmo-clm. *Climatic Change*, **112**, 189–215, doi:10.1007/s10584-011-0195-5.
- Minder, J. R., T. W. Letcher, and C. Liu, 2018: The character and causes of elevation-dependent warming in high-resolution simulations of rocky mountain climate change. *J. Climate*, **31** (6), 2093–2113, doi:10.1175/JCLI-D-17-0321.1.
- Palazzi, E., L. Filippi, and J. von Hardenberg, 2017: Insights into elevation-dependent warming in the tibetan plateau-himalayas from cmip5 model simulations. *Clim. Dynam.*, **48** (11-12), 3991–4008, doi:10.1007/s00382-016-3316-z.

- Palazzi, E., L. Mortarini, S. Terzago, and J. Von Hardenberg, 2019: Elevation-dependent warming in global climate model simulations at high spatial resolution. *Clim. Dynam.*, **52** (5-6), 2685–2702, doi:10.1007/s00382-018-4287-z.
- Pepin, N., and Coauthors, 2015: Elevation-dependent warming in mountain regions of the world. *Nat. Clim. Change*, **5** (5), 424–430, doi:10.1038/nclimate2563.
- Vuille, M., R. S. Bradley, M. Werner, and F. Keimig, 2003: 20th century climate change in the tropical andes: observations and model results. *Climatic Change*, **59**, 75–99, doi:10.1007/978-94-015-1252-7\_5.
